# Supplementary material for: 少年院におけるLD, AD/HDスクリーニングテストと逆境的小児期体験(児童虐待を含む)に関する調査 : 発達精神病理学的視点に基づく非行の risk factor
Source: Royal Society of Chemistry journal article supplement (doi:10.1039/c6dt04695a), 2007-11-01
Supplement: c6dt04695a1.pdf [file c6dt04695a1.pdf]

## Supplementary information

Table S1 Selected bond distances (Å) and angles (°) for title polymer

|                      |            |                      |            |
|----------------------|------------|----------------------|------------|
| Cu(1)-O(4) #1        | 1.962(3)   | Cu(1)-O(2) #1        | 1.959(3)   |
| Cu(1)-O(3)           | 1.958(3)   | Cu(1)-O(1)           | 1.984(3)   |
| Cu(1)-N(2) #2        | 2.161(3)   |                      |            |
| C(10)-O(4)-Cu(1)     | 121.1(2)   | O(3)-Cu(1)-O(2)      | 89.71(12)  |
| O(3)-Cu(1)-O(4)      | 167.43(11) | O(2)#1-Cu(1)-O(4) #1 | 88.48(12)  |
| O(3)-Cu(1)-O(1)      | 90.84(12)  | O(2)#1-Cu(1)-O(1)    | 167.50(10) |
| O(4)#1-Cu(1)-O(1)    | 88.27(12)  | O(3)-Cu(1)-N(2)#2    | 96.81(11)  |
| O(2)#1-Cu(1)-N(2)#2  | 98.85(11)  | O(4)#1-Cu(1)-N(2)#2  | 95.76(11)  |
| O(1)-Cu(1)-N(2)#2    | 93.49(11)  | O(3)-Cu(1)-Cu(1)#1   | 82.38(8)   |
| O(2)#1-Cu(1)-Cu(1)#1 | 83.59(8)   | O(4)#1-Cu(1)-Cu(1)#1 | 85.05(8)   |

Symmetry transformations used to generate equivalent atoms: #1 -x,-y+2,-z; #2 -x,-y+1,-z

Table S2. Parameters for fits of the heat capacity (in  $\text{J} \cdot \text{mol}^{-1} \cdot \text{K}^{-1}$ ) of **1**.

| Parameter | Temperature range                 | Coefficients |
|-----------|-----------------------------------|--------------|
|           | $0 \leq T/\text{K} \leq 6.65$     |              |
| $\gamma$  |                                   | 7.26415E-03  |
| $B_3$     |                                   | 2.15654E-03  |
| $B_5$     |                                   | -2.90347E-05 |
| $B_{asw}$ |                                   | 1.18766E-02  |
| $\Delta$  |                                   | 7.12         |
|           | RMS% = 1.85                       |              |
|           | $6.65 \leq T/\text{K} \leq 48.25$ |              |
| $A_0$     |                                   | 2.91962E+00  |
| $A_1$     |                                   | -1.43857E+00 |
| $A_2$     |                                   | 2.26735E-01  |
| $A_3$     |                                   | -7.15388E-03 |
| $A_4$     |                                   | 1.23487E-04  |
| $A_5$     |                                   | -1.13151E-06 |
| $A_6$     |                                   | 4.22975E-09  |
|           | RMS% = 0.55                       |              |
|           | $48.25 \leq T/\text{K} \leq 300$  |              |

|                |              |
|----------------|--------------|
| $n_D$          | 1.94         |
| $\theta_D$     | 171          |
| $n_E$          | 0.52         |
| $\theta_E$     | 241          |
| $A_1$          | 1.17677E+00  |
| $A_2$          | -6.72518E-04 |
| $RMS\% = 0.25$ |              |

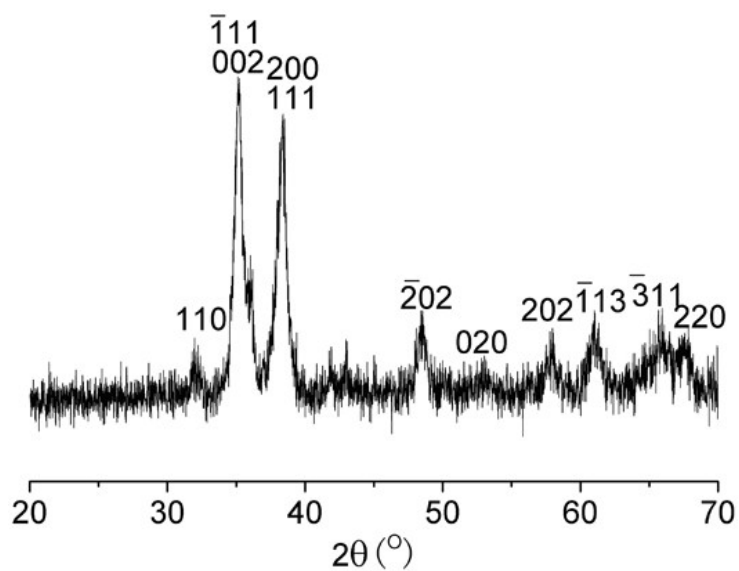

Figure S1. X-ray powder diffraction for the polymer after thermal decomposition
